# Supplementary material for: Multiple Immunostainings with Different Epitope Retrievals—The FOLGAS Protocol
Source: MDPI journal article supplement (doi:10.3390/ijms23010223), 2021-12-25
Supplement: s1 [file s1]

Observer 1 (SK)

| Immunohistochemistry |                 |                    |       |                |                    |       |                      |                    |       |                |                    |       |
|----------------------|-----------------|--------------------|-------|----------------|--------------------|-------|----------------------|--------------------|-------|----------------|--------------------|-------|
|                      | Germinal Center |                    |       | Mantle Zone    |                    |       | Interfollicular Area |                    |       | Epithelium     |                    |       |
| Single Staining      | Positive Cells  | Staining Intensity | Score | Positive Cells | Staining Intensity | Score | Positive Cells       | Staining Intensity | Score | Positive Cells | Staining Intensity | Score |
| Bcl6                 | 3               | 3                  | 9     | 2              | 2                  | 4     | 2                    | 2                  | 4     | 4              | 2                  | 8     |
| FoxP3                | 1               | 3                  | 3     | 1              | 3                  | 3     | 2                    | 3                  | 6     | 1              | 3                  | 3     |
| PAX5                 | 4               | 2                  | 8     | 4              | 3                  | 12    | 2                    | 3                  | 6     | 3              | 3                  | 9     |

Triple Staining

|       |   |   |    |   |   |    |   |   |   |   |   |   |
|-------|---|---|----|---|---|----|---|---|---|---|---|---|
| Bcl6  | 3 | 3 | 9  | 1 | 2 | 2  | 1 | 2 | 2 | 3 | 1 | 3 |
| FoxP3 | 1 | 2 | 2  | 1 | 3 | 3  | 2 | 3 | 6 | 1 | 3 | 3 |
| PAX5  | 4 | 3 | 12 | 4 | 3 | 12 | 2 | 3 | 6 | 3 | 3 | 9 |

| Immunofluorescence |                 |  |  |             |  |  |                      |  |  |            |  |  |
|--------------------|-----------------|--|--|-------------|--|--|----------------------|--|--|------------|--|--|
|                    | Germinal Center |  |  | Mantle Zone |  |  | Interfollicular Area |  |  | Epithelium |  |  |

| Single Staining | Positive Cells | Staining Intensity | Score |
|-----------------|----------------|--------------------|-------|----------------|--------------------|-------|----------------|--------------------|-------|----------------|--------------------|-------|
| CD163 (555)     | 1              | 2                  | 2     | 1              | 1                  | 1     | 2              | 3                  | 6     | 1              | 3                  | 3     |
| CD68 (Aqua)     | 1              | 3                  | 3     | 1              | 3                  | 3     | 2              | 3                  | 6     | 1              | 3                  | 3     |
| RBPJ (488)      | 4              | 1                  | 4     | 4              | 1                  | 4     | 4              | 1                  | 4     | 4              | 1                  | 4     |

#### Triple Staining

|             |   |   |   |   |   |   |   |   |   |   |   |   |
|-------------|---|---|---|---|---|---|---|---|---|---|---|---|
| CD163 (555) | 1 | 2 | 2 | 0 | 0 | 0 | 2 | 3 | 6 | 1 | 3 | 3 |
| CD68 (Aqua) | 1 | 3 | 3 | 1 | 3 | 3 | 2 | 3 | 6 | 1 | 3 | 3 |
| RBPJ (488)  | 4 | 1 | 4 | 4 | 2 | 8 | 4 | 2 | 8 | 4 | 2 | 8 |

Observer 2 (MS)

| Immunohistochemistry |                 |                    |       |                |                    |       |                      |                    |       |                |                    |       |
|----------------------|-----------------|--------------------|-------|----------------|--------------------|-------|----------------------|--------------------|-------|----------------|--------------------|-------|
|                      | Germinal Center |                    |       | Mantle Zone    |                    |       | Interfollicular Area |                    |       | Epithelium     |                    |       |
| Single Staining      | Positive Cells  | Staining Intensity | Score | Positive Cells | Staining Intensity | Score | Positive Cells       | Staining Intensity | Score | Positive Cells | Staining Intensity | Score |
| Bcl6                 | 3               | 3                  | 9     | 2              | 1                  | 2     | 2                    | 1                  | 2     | 4              | 2                  | 8     |
| FoxP3                | 1               | 3                  | 3     | 1              | 3                  | 3     | 2                    | 3                  | 6     | 1              | 3                  | 3     |
| PAX5                 | 4               | 2                  | 8     | 4              | 3                  | 12    | 2                    | 3                  | 6     | 2              | 3                  | 6     |

Triple Staining

|       |   |   |   |   |   |    |   |   |   |   |   |   |
|-------|---|---|---|---|---|----|---|---|---|---|---|---|
| Bcl6  | 3 | 2 | 6 | 1 | 2 | 2  | 1 | 2 | 2 | 4 | 2 | 8 |
| FoxP3 | 1 | 3 | 3 | 1 | 3 | 3  | 1 | 3 | 3 | 1 | 3 | 3 |
| PAX5  | 3 | 3 | 9 | 4 | 3 | 12 | 2 | 3 | 6 | 2 | 3 | 6 |

| Immunofluorescence |                 |  |  |             |  |  |                      |  |  |            |  |  |
|--------------------|-----------------|--|--|-------------|--|--|----------------------|--|--|------------|--|--|
|                    | Germinal Center |  |  | Mantle Zone |  |  | Interfollicular Area |  |  | Epithelium |  |  |

| Single Staining | Positive Cells | Staining Intensity | Score |
|-----------------|----------------|--------------------|-------|----------------|--------------------|-------|----------------|--------------------|-------|----------------|--------------------|-------|
| CD163 (555)     | 1              | 1                  | 1     | 1              | 1                  | 1     | 2              | 3                  | 6     | 1              | 3                  | 3     |
| CD68 (Aqua)     | 1              | 3                  | 3     | 1              | 3                  | 3     | 2              | 3                  | 6     | 1              | 3                  | 3     |
| RBP1 (488)      | 4              | 1                  | 4     | 4              | 1                  | 4     | 4              | 1                  | 4     | 4              | 1                  | 4     |

#### Triple Staining

|             |   |   |   |   |   |   |   |   |   |   |   |   |
|-------------|---|---|---|---|---|---|---|---|---|---|---|---|
| CD163 (555) | 1 | 1 | 1 | 0 | 0 | 0 | 2 | 3 | 6 | 1 | 3 | 3 |
| CD68 (Aqua) | 1 | 3 | 3 | 1 | 3 | 3 | 2 | 3 | 6 | 1 | 3 | 3 |
| RBP1 (488)  | 4 | 1 | 4 | 4 | 2 | 8 | 4 | 1 | 4 | 4 | 2 | 8 |

**Suppl. Table S1.** Evaluations of positive cells and staining intensities for single stainings and corresponding triple stainings, respectively. Semiquantitative evaluations were as follows: Relative amount of positive cells: 0: 0%; 1:  $\leq 10\%$ ; 2:  $>10\% \leq 50\%$ ; 3:  $>50\% \leq 80\%$ ; 4:  $>80\%$ . Staining intensity: 1: weak; 2: moderate; 3: strong. Score was calculated by multiplying positive cells with staining intensity.
